# Supplementary material for: Solar-driven pH-responsive oil–water separation membranes for effective oil–water emulsion separation
Source: Royal Society of Chemistry journal article supplement (doi:10.1039/d4nj00915k), 2024-01-01
Supplement: d4nj00915k1.pdf [file d4nj00915k1.pdf]

## Supplementary information

The abrasion resistance experiment:

Firstly, we cut the PP-PPy film and PP-PPy-pHR film to  $1.5 * 3.0 \text{ cm}^2$ , weigh them, and record the initial mass  $m_0$ . Next, we will fix the white substrate on the table. Place the fixed size film on the surface of the white substrate. Then, place a 100 g ( $\approx 1\text{N}$ ) weight on the surface of the membrane.

At last, we clamp the end of the membrane with tweezers and pull, with a length of 6.5 centimeters. Repeat the above operation, and the membrane will be rubbed 20 times. Repeat the above procedure for 20 times, weigh and record the mass loss.

Table S1. Comparison of PP-PPy<sub>2</sub> and PP-PPy<sub>1</sub>-pHR, PP-PPy<sub>2</sub>-pHR, and PP-PPy<sub>3</sub>-pHR on water evaporation rate

| Membrane                                                                | PP-PPy <sub>2</sub> | PP-PPy <sub>1</sub> -pHR | PP-PPy <sub>2</sub> -pHR | PP-PPy <sub>3</sub> -pHR |
|-------------------------------------------------------------------------|---------------------|--------------------------|--------------------------|--------------------------|
| Evaporation Rate<br>( $\text{kg}\cdot\text{m}^{-2}\cdot\text{h}^{-1}$ ) | 1.61                | 0.72                     | 1.58                     | 1.05                     |

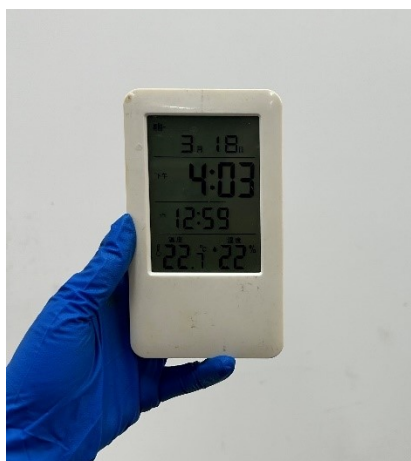

Figure S1: Pictures of ambient temperature and humidity of water evaporation experiments in March 2024

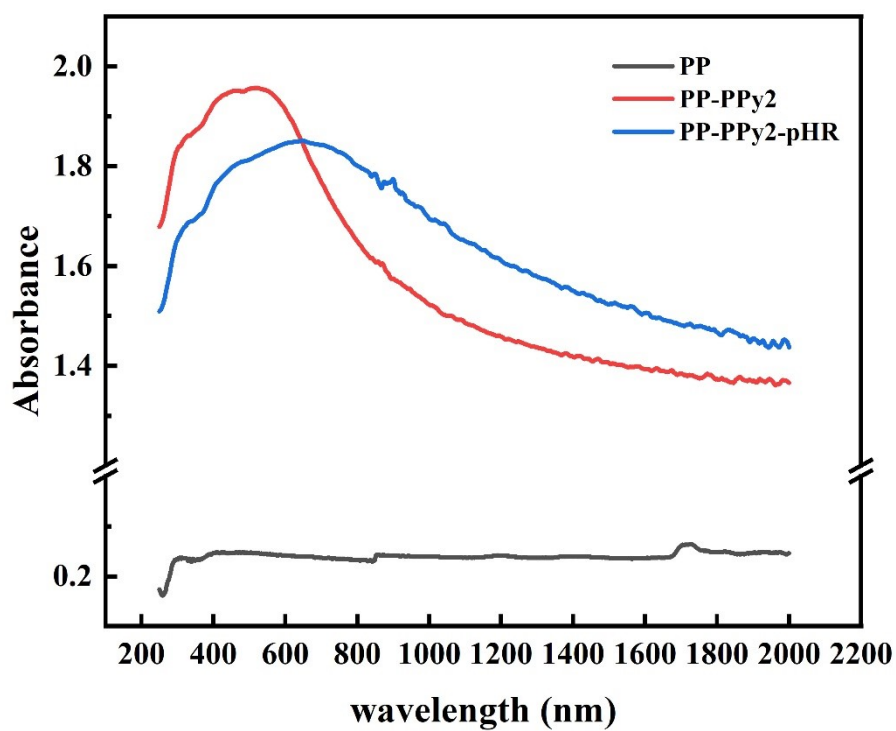

Figure S2: Absorbance test of PP, PP-PPy2, PP-PPy2-pHR
